# Supplementary material for: Methallylsulfonate Polymeric Antiscalants for Application in Thermal Desalination Processes
Source: MDPI journal article supplement (doi:10.3390/polym16192838), 2024-10-08
Supplement: s1 [file polymers-3246752-supplementary.pdf › polymers-3246752-supplementary.pdf]

## Supplementary Information

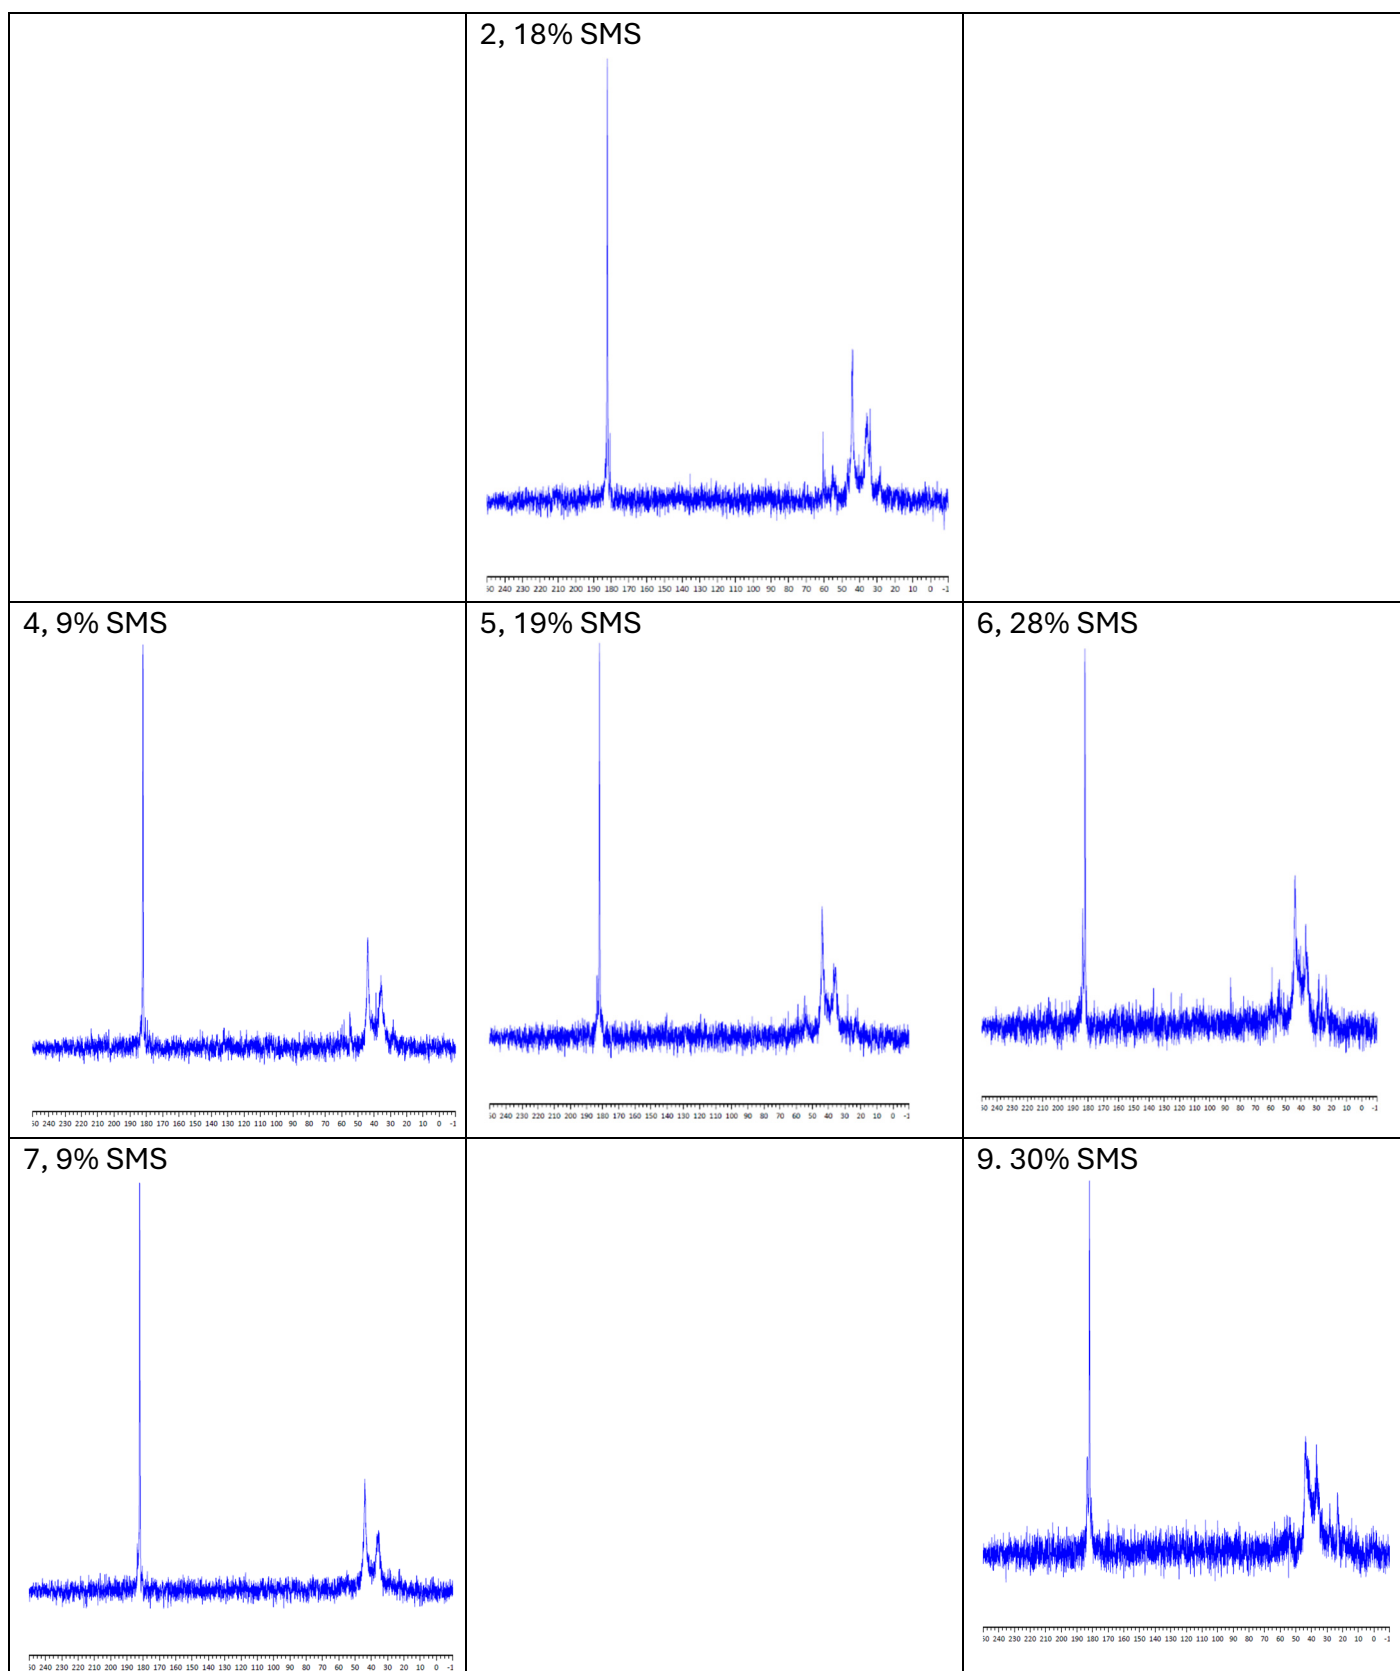

Figure S1:  $^{13}\text{C}$  NMR of copolymers

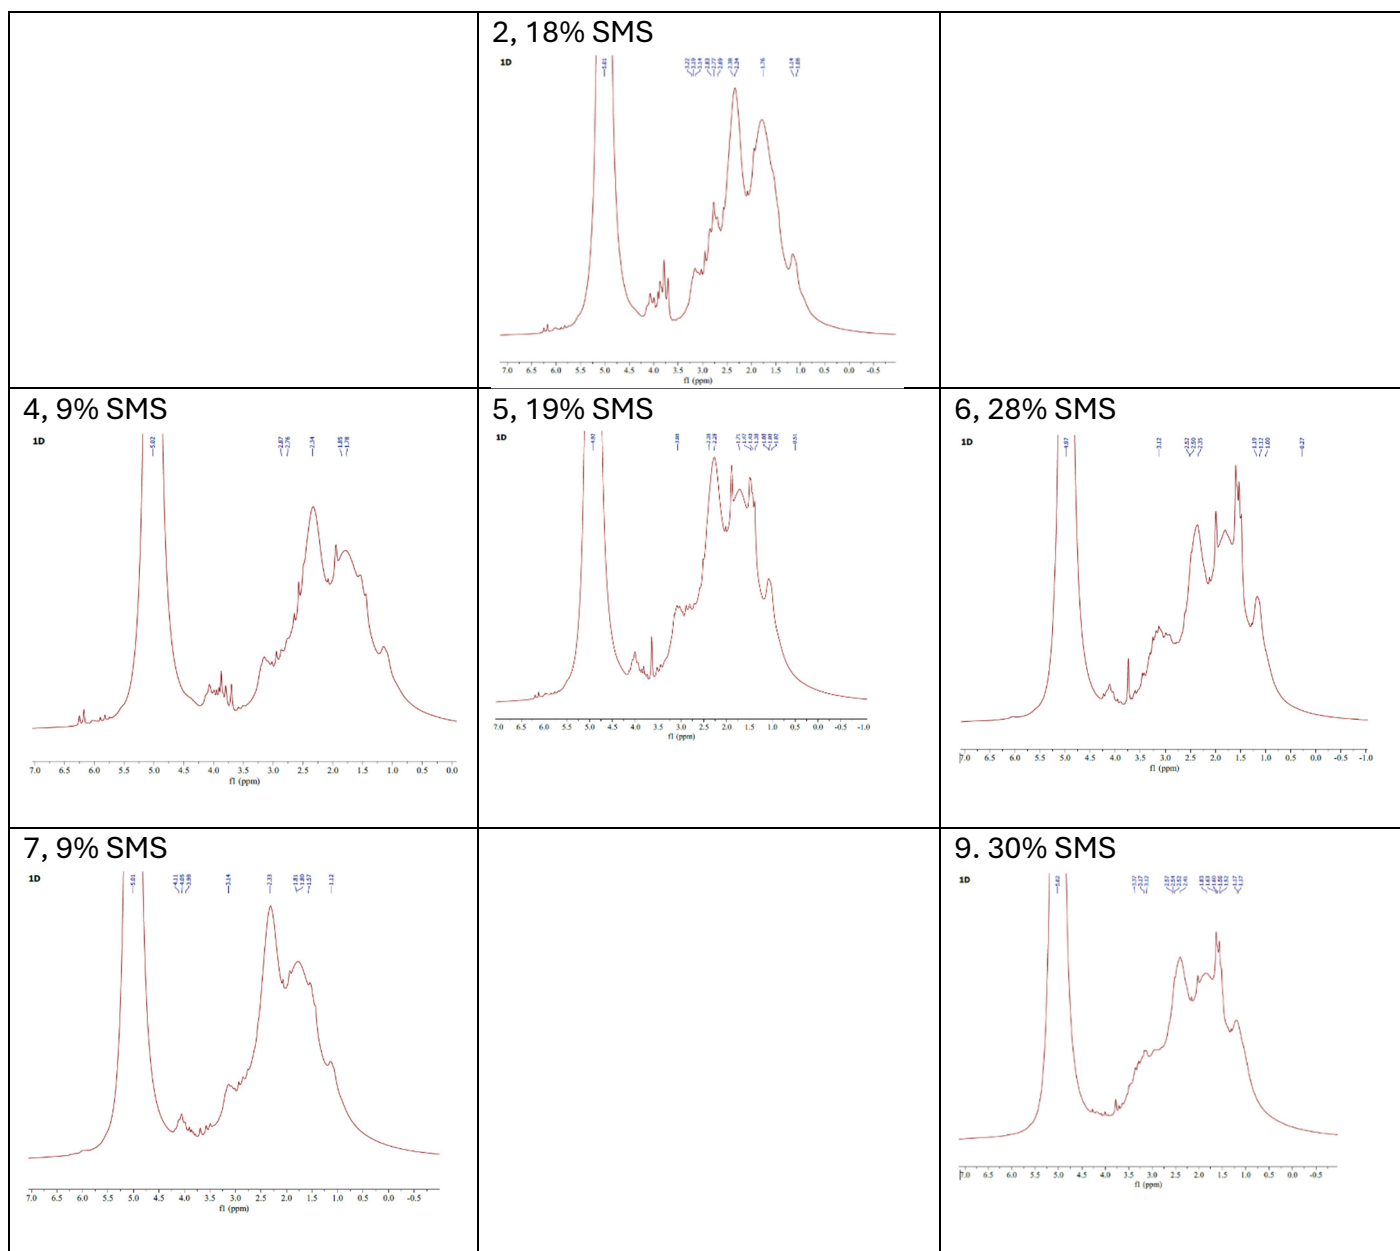

Figure S2: <sup>1</sup>H NMR of copolymers

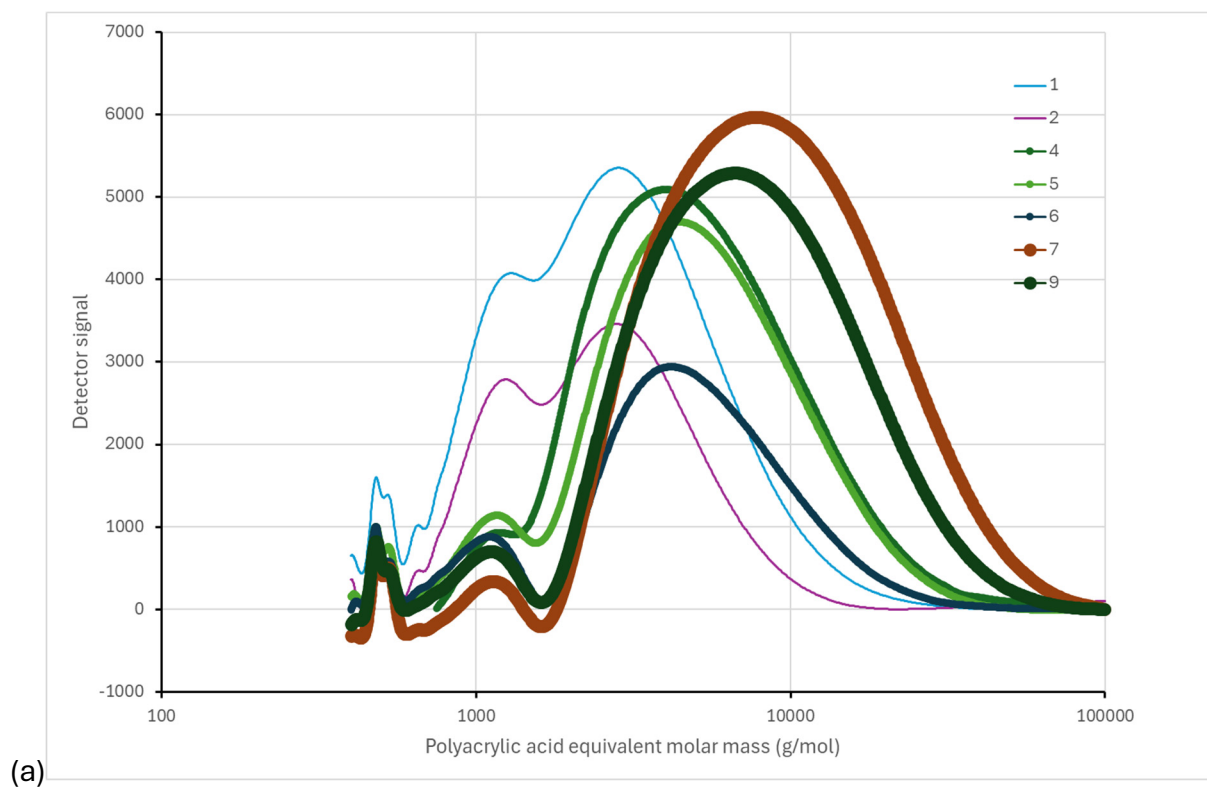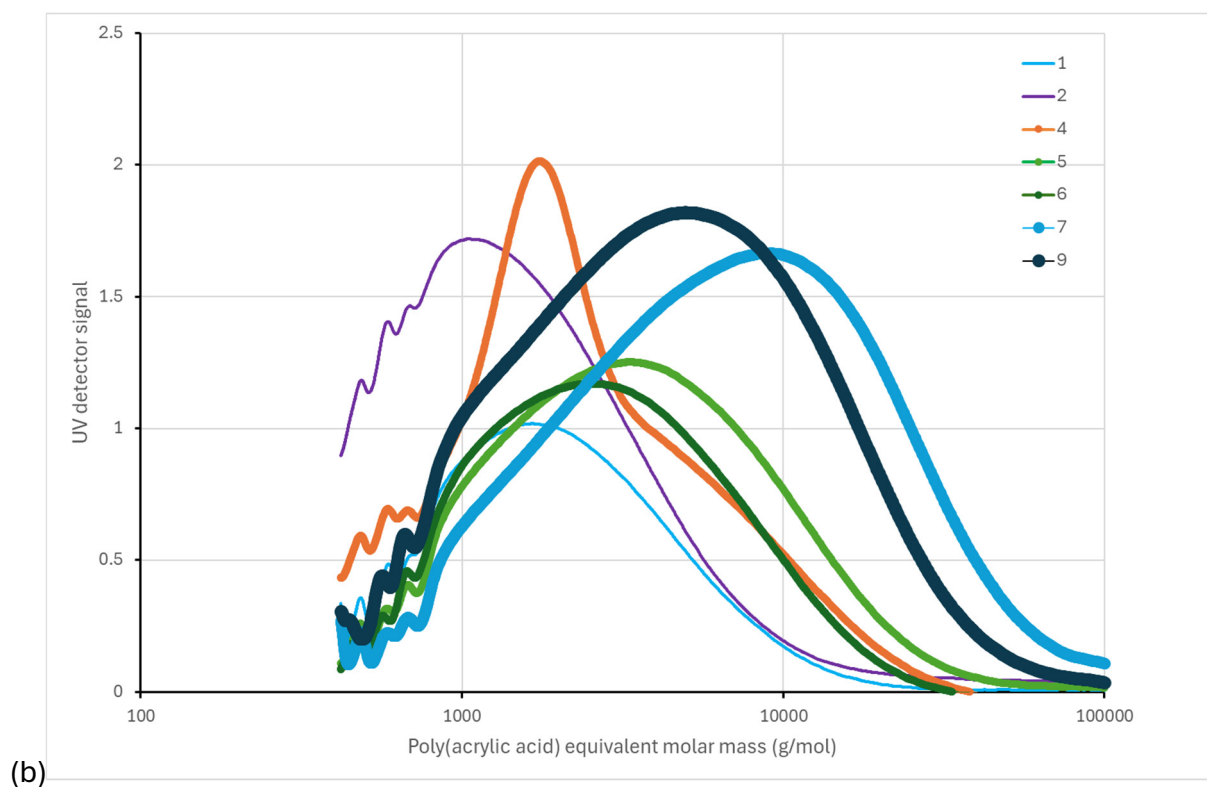

Figure S3: Size Exclusion Chromatography eluograms; (a) RI detector; (b) UV detector
